# Supplementary material for: Screening and identification of key microRNAs and regulatory pathways associated with the renal fibrosis process
Source: Royal Society of Chemistry journal article supplement (doi:10.1039/d1mo00498k), 2022-04-27
Supplement: d1mo00498k1.xlsx [file d1mo00498k1.xlsx]

## Sheet: DE-M2vsC
sRNA	M2_readcount	C_readcount	log2FoldChange	pval	padj
rno-miR-136-3p	1064.6	19.4194	5.2716	6.1412e-19	3.4329e-16
novel_82	1738.37	263.654	2.6564	1.2321e-16	3.4438e-14
rno-miR-193b-3p	98.0044	1257.22	-3.5151	5.6426e-16	1.0514e-13
rno-miR-7a-1-3p	154.313	21.0845	2.7871	2.6918e-15	3.7618e-13
rno-miR-434-5p	1366.12	26.4915	5.0139	1.4177e-13	1.585e-11
rno-miR-411-5p	10720.5	594.378	3.8798	6.5403e-13	6.0934e-11
rno-miR-18a-5p	130.681	12.4957	3.2151	1.202e-12	9.5989e-11
rno-miR-874-3p	52.3803	482.64	-3.0547	2.4604e-12	1.7192e-10
rno-miR-146a-5p	3953.09	19023.8	-2.2146	2.8297e-12	1.7576e-10
rno-miR-148a-3p	424462	62915.6	2.6604	4.0336e-12	2.0106e-10
rno-miR-127-5p	349.319	9.9074	4.5685	4.0902e-12	2.0106e-10
rno-miR-379-5p	9257	600.381	3.6789	4.3161e-12	2.0106e-10
rno-miR-455-3p	127.285	794.369	-2.556	5.4932e-12	2.3621e-10
rno-miR-328a-3p	551.076	4103.57	-2.7853	6.3726e-12	2.5445e-10
rno-miR-129-5p	102.357	1721.79	-3.7668	9.6466e-12	3.4237e-10
rno-miR-542-3p	10390.7	700.24	3.6259	9.7995e-12	3.4237e-10
rno-miR-219a-2-3p	13.7735	167.041	-3.3624	1.3434e-11	4.3009e-10
rno-miR-219b	13.7735	166.341	-3.3571	1.3849e-11	4.3009e-10
rno-miR-341	600.152	18.4464	4.4625	1.5655e-11	4.6058e-10
rno-miR-152-3p	24772.2	3768.51	2.612	1.3668e-10	3.8203e-09
rno-miR-423-3p	1394.53	9637.72	-2.6736	2.1615e-10	5.7538e-09
rno-miR-129-1-3p	1.20144	64.2077	-4.6746	2.4011e-10	6.1009e-09
rno-miR-362-3p	121.562	11.0853	3.2322	5.7515e-10	1.3979e-08
rno-miR-194-3p	38.1883	429.677	-3.2465	8.4174e-10	1.9606e-08
rno-miR-200b-5p	77.0033	868.292	-3.2531	8.7711e-10	1.9612e-08
rno-miR-30c-2-3p	1849.48	13790.6	-2.7589	1.0846e-09	2.3318e-08
rno-miR-374-3p	1324.13	200.128	2.6057	1.8906e-09	3.8659e-08
rno-miR-136-5p	27.086	0.708834	4.4144	1.949e-09	3.8659e-08
rno-miR-21-5p	1.05278e+07	778671	3.453	2.0374e-09	3.8659e-08
rno-let-7d-3p	688.598	4771.3	-2.6629	2.0747e-09	3.8659e-08
rno-miR-125a-5p	4936.54	27439.9	-2.3816	3.2032e-09	5.7761e-08
rno-miR-301a-3p	46.5654	1.25256	4.4156	3.6406e-09	6.3597e-08
rno-miR-3543	802.512	28.3498	4.1781	4.9225e-09	8.0932e-08
rno-miR-434-3p	802.512	28.3498	4.1781	4.9225e-09	8.0932e-08
rno-miR-19b-3p	4968.65	410.691	3.3065	9.0036e-09	1.438e-07
rno-miR-3557-3p	591.299	3413.62	-2.4222	1.1444e-08	1.7771e-07
rno-miR-431	93.6109	1.08022	4.8877	1.2482e-08	1.8859e-07
rno-miR-378a-5p	601.553	3467.42	-2.4195	1.2952e-08	1.9053e-07
rno-miR-3579	83.0507	3.65997	3.9253	1.4268e-08	1.9939e-07
rno-miR-380-5p	83.0507	3.65997	3.9253	1.4268e-08	1.9939e-07
rno-miR-181a-5p	21434.6	90673	-2.0192	1.7667e-08	2.4088e-07
rno-miR-19a-3p	267.57	10.1462	4.0654	1.8406e-08	2.4497e-07
rno-miR-17-5p	2475.34	1014.9	1.2714	2.0525e-08	2.6683e-07
rno-miR-379-3p	145.998	7.60765	3.765	2.4484e-08	3.1106e-07
rno-let-7b-3p	16.9036	127.703	-2.7328	2.7684e-08	3.3942e-07
rno-miR-126a-5p	30657.8	3071.25	3.0735	2.7931e-08	3.3942e-07
rno-miR-664-3p	22.728	153.802	-2.5911	5.5981e-08	6.6582e-07
rno-miR-3596c	5829.05	23437.3	-1.9472	6.9076e-08	8.0445e-07
rno-let-7e-5p	5869.91	23556.6	-1.9445	7.1157e-08	8.1177e-07
rno-miR-340-5p	11064.8	2219.81	2.225	7.6958e-08	8.6039e-07
rno-miR-21-3p	243.102	23.5339	3.086	1.0506e-07	1.1515e-06
rno-let-7d-5p	4455.18	13407.4	-1.5582	1.1169e-07	1.1804e-06
rno-miR-3596b	4455.18	13406	-1.5581	1.1205e-07	1.1804e-06
rno-miR-872-5p	10818.3	2326.58	2.1337	1.1548e-07	1.1804e-06
rno-miR-106b-5p	1258.02	308.453	1.9637	1.1614e-07	1.1804e-06
rno-miR-664-2-5p	29.5372	170.372	-2.4082	1.3963e-07	1.3938e-06
rno-miR-142-3p	1095.68	69.9715	3.5097	1.8686e-07	1.8325e-06
rno-miR-92a-3p	1678.22	7631.97	-2.102	2.0091e-07	1.9364e-06
rno-miR-330-3p	94.4641	448.875	-2.157	2.3874e-07	2.262e-06
rno-miR-181b-5p	2816.98	9083.34	-1.6493	2.8359e-07	2.6421e-06
rno-miR-423-5p	1422.88	5928.37	-1.9851	4.3227e-07	3.9613e-06
rno-miR-375-3p	478.078	4482.09	-2.9518	5.8437e-07	5.2687e-06
rno-miR-29b-5p	58.3412	352.875	-2.4506	6.2435e-07	5.5398e-06
rno-miR-455-5p	2531.34	761.376	1.6875	6.3515e-07	5.5477e-06
rno-miR-92b-3p	22.7087	119.675	-2.269	6.916e-07	5.8701e-06
rno-miR-101b-3p	29555.7	5823.81	2.2321	6.9307e-07	5.8701e-06
rno-miR-144-3p	27.9026	0.667663	4.1189	1.1408e-06	9.5177e-06
rno-miR-26a-5p	266871	632970	-1.228	1.168e-06	9.6017e-06
rno-miR-125b-5p	8026.05	23797	-1.5322	1.2045e-06	9.7582e-06
rno-miR-30d-3p	440.03	115.829	1.8608	1.2258e-06	9.7886e-06
rno-miR-20a-5p	6824.68	2313.93	1.525	1.2589e-06	9.9118e-06
rno-miR-140-3p	22705.1	69595	-1.576	1.6015e-06	1.2404e-05
rno-miR-511-3p	54.6402	4.78901	3.1231	1.6199e-06	1.2404e-05
rno-miR-149-5p	190.927	880.693	-2.1041	1.7209e-06	1.3e-05
rno-miR-3588	7890.78	23107.8	-1.5145	1.7599e-06	1.3078e-05
rno-let-7c-1-3p	30.8608	1.53346	3.6021	1.7781e-06	1.3078e-05
rno-miR-16-5p	14509.8	5623.47	1.3428	1.8763e-06	1.3621e-05
rno-miR-126b	145.468	7.27876	3.6362	1.9228e-06	1.378e-05
rno-miR-146b-5p	105514	12061.2	2.8499	2.207e-06	1.5616e-05
rno-miR-322-5p	2381.06	489.544	2.1681	2.4306e-06	1.6984e-05
rno-miR-1843a-3p	130.852	503.501	-1.8707	2.474e-06	1.7073e-05
rno-miR-299b-5p	177.449	20.3925	2.8369	2.8406e-06	1.9264e-05
rno-miR-135a-3p	7.7398	68.1106	-2.8055	2.8603e-06	1.9264e-05
rno-miR-299a-3p	286.126	29.4268	2.9524	3.0941e-06	2.059e-05
rno-miR-377-3p	32.955	1.20325	3.8177	3.5717e-06	2.3489e-05
rno-miR-148a-5p	3830.13	549.946	2.5876	3.7697e-06	2.4503e-05
rno-miR-293-5p	28.8877	3.28044	2.8464	4.6957e-06	3.0171e-05
rno-miR-30d-5p	242438	749713	-1.5838	4.8303e-06	3.0683e-05
rno-miR-34a-5p	1102.86	355.582	1.5867	5.1242e-06	3.2184e-05
rno-miR-376c-3p	112.765	9.72692	3.1021	6.4158e-06	3.9849e-05
rno-miR-200c-3p	2804.93	12188	-2.0195	6.642e-06	4.0801e-05
rno-miR-200b-3p	26575.5	117574	-2.0414	6.9737e-06	4.2315e-05
rno-miR-142-5p	2815.68	381.948	2.6386	7.0399e-06	4.2315e-05
rno-miR-204-5p	649.937	1609.85	-1.2835	8.6784e-06	5.1609e-05
rno-miR-3592	286.918	33.5875	2.7846	1.1083e-05	6.5214e-05
rno-miR-382-3p	288.402	33.8594	2.7808	1.1428e-05	6.6391e-05
rno-miR-361-3p	1125.19	3542.86	-1.6041	1.152e-05	6.6391e-05
rno-miR-223-5p	567.508	64.4007	2.8113	1.3166e-05	7.5101e-05
rno-miR-339-3p	301.66	973.139	-1.6313	1.6578e-05	9.2955e-05
rno-let-7b-5p	16808.2	67145.1	-1.9063	1.6629e-05	9.2955e-05
rno-miR-181d-5p	954.28	2512.23	-1.3649	1.6838e-05	9.3192e-05
rno-miR-653-3p	3.3345	33.2596	-2.8666	1.8463e-05	0.00010027
rno-miR-32-5p	239.816	15.8747	3.2924	1.8476e-05	0.00010027
rno-miR-3596a	57343.4	143987	-1.2998	2.2057e-05	0.00011855
rno-let-7a-5p	57417.6	144150	-1.2995	2.2495e-05	0.00011976
rno-miR-190a-5p	193.398	41.1123	2.1009	2.295e-05	0.00012103
rno-miR-450b-3p	20.2513	101.59	-2.172	2.4967e-05	0.00013044
rno-miR-151-3p	8207.02	31466.7	-1.8509	2.6104e-05	0.00013511
rno-miR-30c-1-3p	210.405	669.232	-1.6118	2.7292e-05	0.00013996
rno-miR-139-5p	2278.02	9295.8	-1.927	2.9269e-05	0.00014874
rno-miR-582-3p	228.169	92.4302	1.2785	3.0585e-05	0.00015403
rno-miR-99b-5p	34037.6	98767.4	-1.4914	3.1723e-05	0.00015833
rno-miR-25-5p	13.1383	52.6709	-1.9058	3.5174e-05	0.000174
rno-miR-466c-5p	134.435	17.0233	2.661	3.8355e-05	0.00018807
rno-miR-503-5p	604.814	150.446	1.9042	3.9534e-05	0.00019217
rno-miR-192-3p	12.9134	88.5071	-2.4867	3.9956e-05	0.00019255
rno-miR-144-5p	171.915	18.3125	2.8317	4.5955e-05	0.0002177
rno-miR-193a-5p	21.6838	118.362	-2.2611	5.5079e-05	0.0002579
rno-let-7a-1-3p	228.009	63.3932	1.7634	5.5362e-05	0.0002579
novel_124	15.2315	111.274	-2.555	5.6188e-05	0.00025885
rno-miR-3549	21.316	118.147	-2.2785	5.6492e-05	0.00025885
rno-miR-320-3p	3107.04	10511.1	-1.6857	6.191e-05	0.00028137
rno-miR-125a-3p	63.0939	268.295	-1.9647	6.8158e-05	0.00030726
rno-miR-218a-5p	20296.4	7561.43	1.3846	7.3052e-05	0.00032669
rno-miR-380-3p	56.0253	3.8988	3.16	7.3841e-05	0.0003276
rno-miR-223-3p	800.463	124.493	2.4328	7.7624e-05	0.00034167
rno-miR-410-3p	150.958	20.5403	2.5627	9.8487e-05	0.00043011
rno-miR-672-5p	323.851	1729.3	-2.2228	0.00010499	0.00044912
rno-miR-3557-5p	83492.9	298320	-1.7494	0.00010525	0.00044912
rno-miR-378a-3p	83492.9	298319	-1.7494	0.00010525	0.00044912
rno-miR-139-3p	64.6982	219.083	-1.6799	0.00010674	0.00045203
rno-miR-450b-5p	7825.77	2353.11	1.659	0.0001106	0.00046485
rno-miR-450a-5p	9596.66	3036.84	1.5939	0.0001149	0.00047931
rno-miR-7a-5p	38606.7	7657.89	2.1546	0.00012958	0.00053654
rno-miR-3585-3p	36.9759	154.544	-1.9277	0.00013183	0.00054185
rno-miR-295-3p	1.84146	23.5106	-3.018	0.00014332	0.00058478
rno-miR-127-3p	5513.47	618.424	2.7258	0.00016635	0.00067383
rno-miR-147	86.499	22.2488	1.8376	0.00017158	0.00069001
rno-miR-181a-2-3p	36.4339	153.331	-1.93	0.00018959	0.000757
rno-miR-350	110.334	35.5764	1.5621	0.0001951	0.00077349
rno-miR-146a-3p	24.7811	3.69252	2.4258	0.00028246	0.0011042
rno-miR-708-3p	811.711	169.669	2.0765	0.00029969	0.0011634
rno-miR-376a-5p	18.2693	0.708834	3.3387	0.00030712	0.001184
rno-miR-6319	3.60671	22.0318	-2.3283	0.00031038	0.0011884
rno-miR-539-3p	8.70883	0.271864	3.394	0.00034005	0.0012931
rno-miR-212-3p	142.219	30.3925	2.046	0.00034274	0.0012945
rno-miR-98-5p	1958.89	783.573	1.2823	0.00036873	0.0013834
rno-miR-877	14.9797	60.9418	-1.8887	0.00040612	0.0015135
rno-miR-369-3p	112.519	13.936	2.589	0.00042204	0.0015624
rno-miR-337-3p	8.54549	0	3.5997	0.00044615	0.0016408
rno-miR-708-5p	411.273	90.2461	2.0117	0.00044974	0.0016432
rno-miR-99b-3p	1407.83	3420.25	-1.2433	0.00047942	0.0017368
rno-miR-3068-5p	1305.61	314.271	1.907	0.00048157	0.0017368
rno-miR-3559-5p	3326.36	1077.79	1.5488	0.00057109	0.0020334
rno-miR-547-5p	13.9307	48.3188	-1.7077	0.00059355	0.0020868
rno-miR-107-3p	1367.83	4281.62	-1.5644	0.00064782	0.0022633
rno-miR-760-3p	2.59036	20.0794	-2.5766	0.00068169	0.0023598
rno-miR-300-3p	603	130.976	2.0131	0.00068389	0.0023598
rno-miR-292-5p	2.40288	22.2232	-2.601	0.00072872	0.0024991
rno-miR-3578	129.251	27.1112	2.0459	0.00077397	0.0026221
rno-miR-369-5p	129.251	27.1112	2.0459	0.00077397	0.0026221
rno-miR-106b-3p	627.467	1541.77	-1.2544	0.0007821	0.0026337
rno-miR-342-5p	21.3813	74.5711	-1.6958	0.00081982	0.0027442
rno-miR-195-5p	2991.46	929.737	1.5949	0.00084944	0.0028264
rno-miR-129-2-3p	4.98236	33.5193	-2.3791	0.00088905	0.0029407
rno-miR-29a-5p	72.3605	25.7338	1.4245	0.00089498	0.0029429
rno-miR-141-3p	579.065	112.532	2.1197	0.00097171	0.0031765
rno-miR-9a-3p	155.153	61.0687	1.2964	0.0010704	0.0034714
rno-miR-101a-3p	94523.8	21338.7	1.9582	0.0010784	0.0034714
rno-miR-152-5p	423.197	84.3221	2.0895	0.0010805	0.0034714
rno-miR-181b-1-3p	19.6525	3.86534	2.1256	0.0010911	0.0034851
novel_442	61.8608	138.644	-1.1357	0.0011823	0.0037338
rno-miR-34c-3p	102.886	29.191	1.6905	0.0012925	0.0040591
rno-miR-16-3p	29.7199	5.73536	2.1296	0.0013674	0.0042703
rno-miR-218b	16651.5	7082.09	1.1934	0.0014556	0.0045204
rno-miR-140-5p	3382.15	1445.35	1.1869	0.0014862	0.0045898
rno-miR-31a-3p	51.336	11.7376	1.9312	0.0015465	0.0047498
rno-miR-301b-3p	4.44033	0	3.2015	0.0019406	0.0058842
rno-miR-329-3p	63.0801	9.28181	2.3425	0.0019476	0.0058842
rno-miR-702-3p	5.28484	28.2005	-2.1113	0.0019579	0.0058842
rno-miR-676	1290.06	3292.29	-1.2958	0.0019769	0.0059096
rno-miR-340-3p	455.389	211.26	1.0767	0.0021569	0.0064135
rno-miR-132-5p	687.419	171.083	1.8304	0.0021708	0.0064205
rno-let-7f-2-3p	13.0029	1.48326	2.5275	0.0026905	0.0079157
rno-miR-218a-1-3p	2.12217	13.4434	-2.2137	0.0028104	0.0082253
rno-miR-29c-5p	427.183	1043.25	-1.2345	0.0033194	0.0096644
rno-miR-339-5p	790.699	1974.35	-1.2619	0.003562	0.010317
rno-miR-505-3p	182.25	470.507	-1.3031	0.0040848	0.01177
rno-miR-3589	182.25	470.062	-1.3015	0.0042057	0.012056
rno-miR-449a-5p	35.0095	8.95292	1.763	0.0045948	0.013105
rno-miR-143-3p	1.25304e+06	480795	1.312	0.0046645	0.013236
rno-miR-383-5p	4.34472	18.1244	-1.8727	0.004752	0.013416
rno-miR-190b-5p	261.15	85.4249	1.4972	0.0055124	0.015485
rno-miR-30a-3p	4299.21	11850.2	-1.3758	0.0059016	0.016495
rno-miR-196a-3p	28.4845	3.86576	2.2993	0.0059356	0.016507
novel_380	0.367817	7.61489	-2.6467	0.0063859	0.017672
rno-miR-547-3p	407.322	105.656	1.7436	0.0069038	0.019011
rno-miR-99a-5p	40796.1	83824.4	-1.0056	0.0069792	0.019124
rno-miR-3065-5p	39.4271	14.9361	1.3223	0.0074071	0.0201
rno-miR-338-3p	39.4271	14.9361	1.3223	0.0074071	0.0201
rno-miR-23b-5p	0.367817	6.94089	-2.5875	0.0074744	0.020185
novel_212	0.367817	6.74999	-2.5672	0.007782	0.020914
rno-miR-6331	46.1912	7.75738	2.1191	0.0081054	0.021679
rno-miR-3064-5p	3.88742	17.3984	-1.8461	0.0089252	0.023645
rno-miR-433-5p	5.29572	0	2.7539	0.0090786	0.023826
rno-miR-326-3p	48.205	139.411	-1.4134	0.010275	0.026841
rno-miR-3590-3p	21.3667	4.70535	1.8765	0.010866	0.028253
rno-miR-329-5p	87.5223	21.2732	1.7838	0.01096	0.028364
rno-miR-126a-3p	126306	60963.3	1.012	0.011239	0.028952
rno-miR-299a-5p	20.158	3.76672	2.0072	0.011325	0.02904
rno-miR-3560	73.6087	199.24	-1.3418	0.011597	0.029466
rno-miR-501-3p	73.6087	199.24	-1.3418	0.011597	0.029466
rno-miR-1839-5p	3321.59	6831.13	-1.002	0.011671	0.02952
rno-miR-26a-3p	13.5691	3.98928	1.6003	0.011753	0.029553
rno-miR-130a-5p	22.2003	5.58743	1.7444	0.011811	0.029553
rno-miR-146b-3p	54.2104	11.1052	1.9233	0.011895	0.029553
rno-miR-6329	1327.54	502.931	1.3086	0.012616	0.031204
rno-miR-503-3p	77.5506	158.966	-1.0022	0.012699	0.031273
rno-miR-674-5p	71.1868	148.695	-1.0189	0.012848	0.031473
rno-miR-331-3p	29.5675	62.7977	-1.043	0.012929	0.031473
rno-miR-190a-3p	12.8599	2.20023	2.06	0.01295	0.031473
rno-miR-3556a	637.445	1468.59	-1.1422	0.013684	0.032972
rno-miR-301a-5p	52.0424	21.0334	1.2248	0.013859	0.033251
rno-miR-452-5p	108.331	34.1442	1.5061	0.013953	0.033331
rno-miR-1843b-3p	1.48453	9.86671	-2.1473	0.014026	0.033363
rno-miR-335	8.0688	0.939527	2.266	0.014353	0.033998
rno-miR-743a-3p	5.95751	0	2.5723	0.015004	0.035299
rno-miR-874-5p	0.552915	7.34531	-2.413	0.015029	0.035299
rno-miR-346	0	4.12093	-2.535	0.015633	0.036412
rno-miR-154-3p	14.4945	2.22512	2.0888	0.018326	0.041906
rno-miR-96-5p	1013.19	322.772	1.4874	0.018367	0.041906
rno-miR-155-3p	14.3203	2.86789	1.898	0.019493	0.04378
rno-miR-33-3p	13.6755	3.41252	1.7194	0.019567	0.04378
rno-miR-672-3p	1.56926	9.08367	-1.9312	0.01958	0.04378
rno-miR-671	42.3753	115.628	-1.335	0.019738	0.043959
rno-miR-292-3p	1.93708	10.9722	-1.9211	0.019893	0.044127
rno-miR-29b-3p	448.955	164.502	1.3326	0.02035	0.044684
novel_415	0.735635	6.97255	-2.1608	0.020384	0.044684
rno-miR-3587	448.034	164.502	1.33	0.020509	0.044728
rno-miR-487b-3p	49.1518	10.5991	1.8367	0.02069	0.044728
rno-miR-132-3p	814.228	321.277	1.2472	0.020724	0.044728
rno-miR-451-5p	4220.97	1208.23	1.5832	0.022474	0.048135
rno-miR-98-3p	3.50872	0.222554	2.3026	0.023938	0.051073
rno-miR-3102	0	3.63507	-2.3751	0.024191	0.051418
rno-miR-450a-3p	12.2067	3.56859	1.5617	0.024515	0.051802
rno-miR-673-5p	3.60908	0	2.3764	0.024613	0.051802
novel_152	45.6303	14.2033	1.4941	0.02465	0.051802
rno-miR-15b-3p	121.447	45.4246	1.3031	0.024879	0.052089
rno-miR-494-3p	342.418	77.8896	1.7713	0.02575	0.053711
rno-miR-1306-5p	8.96777	22.6031	-1.2349	0.02594	0.053906
rno-miR-3544	10.6809	1.34394	2.1075	0.026463	0.054788
novel_166	3.13001	16.5389	-1.8953	0.026735	0.055147
rno-miR-338-5p	18.3227	42.3143	-1.1162	0.028205	0.057541
rno-miR-1247-5p	24.6419	66.9913	-1.3183	0.028409	0.057748
rno-miR-376b-5p	26.1302	8.43318	1.4497	0.029553	0.059856
rno-miR-99a-3p	19.1914	43.8003	-1.1127	0.030064	0.060453
novel_352	1.28855	7.09648	-1.8686	0.03114	0.061962
rno-miR-199a-5p	31674.6	13867	1.1154	0.031147	0.061962
rno-miR-378b	10.1668	25.1901	-1.1797	0.031614	0.062596
rno-miR-466b-2-3p	20.8913	7.19738	1.3715	0.03169	0.062596
rno-miR-496-3p	25.5844	8.50739	1.4103	0.032036	0.063057
rno-miR-5132-5p	0	2.89278	-2.2539	0.032583	0.063908
rno-miR-210-3p	169.357	365.116	-1.0449	0.033122	0.064704
rno-miR-3574	169.357	364.844	-1.0439	0.03322	0.064704
rno-miR-421-5p	0	2.77789	-2.2418	0.033536	0.065092
rno-miR-489-3p	24.3361	8.52229	1.3739	0.034514	0.066758
rno-miR-298-5p	24.5051	4.33715	1.8912	0.034676	0.066841
rno-miR-3594-3p	0	2.97603	-2.227	0.034927	0.066868
rno-miR-299b-3p	9.93203	2.18395	1.7684	0.034929	0.066868
rno-miR-381-3p	6.57339	1.42581	1.7774	0.035275	0.067299
rno-miR-466b-3p	18.5187	5.95205	1.4409	0.035595	0.067679
rno-miR-212-5p	212.994	65.4681	1.4796	0.037161	0.070417
rno-miR-500-5p	8.52611	1.92023	1.7313	0.037381	0.070594
rno-miR-410-5p	6.14261	0.214416	2.189	0.038162	0.071828
rno-miR-122-5p	60.4863	261.544	-1.7042	0.039837	0.074727
rno-miR-365-3p	306.2	818.729	-1.2819	0.040264	0.075157
novel_209	0	2.88555	-2.167	0.040335	0.075157
rno-miR-325-5p	6.95209	19.5429	-1.3121	0.042066	0.077351
novel_412	0	4.57556	-2.138	0.043112	0.078757
rno-miR-541-5p	5363.54	1284.52	1.6703	0.043707	0.079584
rno-miR-653-5p	218.075	70.4105	1.4182	0.047162	0.085319
rno-miR-665	6.14261	0.271864	2.0939	0.047448	0.085559
rno-miR-490-5p	0	2.49789	-2.0955	0.047454	NA
rno-miR-505-5p	1.76524	8.78015	-1.7513	0.048614	0.087381
rno-miR-219a-5p	14.9556	3.81645	1.602	0.049275	0.088284

## Sheet: DE-M4vsC
sRNA	M4_readcount	C_readcount	log2FoldChange	pval	padj
rno-miR-3543	916.143	31.7395	3.5047	6.0448e-07	9.5161e-05
rno-miR-434-3p	916.143	31.7395	3.5047	6.0448e-07	9.5161e-05
rno-miR-219a-2-3p	16.6954	189.799	-2.915	7.2093e-07	9.5161e-05
rno-miR-219b	16.6954	189.02	-2.9104	7.4636e-07	9.5161e-05
rno-miR-127-5p	122.154	11.2605	2.8473	1.8677e-06	0.00019051
rno-miR-431	66.7364	1.19712	3.5147	3.0226e-06	0.00025692
rno-miR-434-5p	344.641	29.9448	2.7982	1.2529e-05	0.00091283
rno-miR-129-5p	262.979	1947.53	-2.4559	1.5263e-05	0.00097302
rno-miR-129-1-3p	7.23854	72.7127	-2.6642	2.2921e-05	0.0012989
rno-miR-411-5p	4291.38	676.805	2.3003	2.6067e-05	0.0013294
rno-miR-375-3p	846.7	5077.6	-2.2423	3.2423e-05	0.0015032
rno-miR-146b-5p	85509.9	13854	2.251	5.3092e-05	0.0022564
rno-miR-341	171.711	20.9533	2.4305	0.00012399	0.0048643
rno-miR-379-5p	4249.44	681.408	2.2095	0.00017224	0.0062744
rno-miR-34a-5p	1077.44	403.588	1.3407	0.00019004	0.0064614
rno-miR-411-3p	417.51	66.0718	2.2096	0.0002089	0.006513
rno-miR-29b-5p	82.9561	398.932	-1.9727	0.0002171	0.006513
rno-miR-511-3p	40.0724	5.55032	2.2978	0.00023197	0.0065724
rno-miR-223-5p	370.303	73.5889	2.0047	0.00028185	0.0075655
rno-miR-299a-5p	35.3591	4.30537	2.3614	0.00031675	0.008077
rno-miR-653-3p	8.05853	37.6465	-1.9305	0.00033511	0.0081383
rno-let-7c-1-3p	21.0982	1.75206	2.5303	0.00035125	0.0081426
rno-miR-3579	38.8686	4.17758	2.3664	0.00064647	0.013185
rno-miR-380-5p	38.8686	4.17758	2.3664	0.00064647	0.013185
rno-miR-493-3p	54.2996	8.24211	2.169	0.00067542	0.013185
rno-miR-194-3p	75.2145	485.991	-2.1551	0.00068296	0.013185
rno-miR-370-5p	7.59649	0	2.6946	0.00069805	0.013185
novel_124	28.2346	125.989	-1.8418	0.0010261	0.018369
rno-miR-673-3p	14.9415	0.545667	2.5615	0.0010445	0.018369
rno-miR-377-3p	11.8831	1.38344	2.2668	0.0011491	0.019535
rno-miR-672-3p	0.787557	10.295	-2.3737	0.0012745	0.020967
rno-miR-223-3p	553.768	143.102	1.7035	0.001343	0.021404
rno-miR-299a-3p	116.823	33.3597	1.6028	0.0014451	0.022333
rno-miR-3585-3p	51.2169	175.122	-1.5736	0.0018204	0.027306
rno-miR-7a-1-3p	102.008	23.9903	1.7731	0.0019164	0.027924
rno-miR-378a-3p	108997	337726	-1.467	0.0022548	0.031082
rno-miR-3557-5p	108997	337728	-1.467	0.002255	0.031082
novel_415	0.353089	7.95	-2.3346	0.0025429	0.034129
rno-miR-34c-3p	121.319	33.3074	1.6157	0.0027076	0.035407
rno-miR-383-5p	4.4983	20.614	-1.8039	0.0030348	0.038694
rno-miR-136-5p	9.11352	0.808506	2.2088	0.0034159	0.041924
rno-miR-132-5p	593.85	195.493	1.4316	0.0035913	0.041924
rno-miR-152-3p	15272	4321.31	1.5782	0.0035991	0.041924
rno-miR-142-5p	3990.05	443.056	2.15	0.0036629	0.041924
novel_212	0.434468	7.68717	-2.2514	0.0036992	0.041924
rno-miR-3557-3p	1233.74	3865.92	-1.4601	0.0039498	0.043791
rno-miR-378a-5p	1256.53	3926.82	-1.4557	0.0041459	0.044987
rno-miR-299b-3p	14.9323	2.50405	1.9464	0.0043234	0.045031
rno-miR-146a-3p	31.9332	4.29466	2.0491	0.00441	0.045031
rno-miR-299b-5p	78.7855	23.114	1.534	0.0044148	0.045031
rno-miR-129-2-3p	7.82663	37.913	-1.8058	0.0045629	0.045629
rno-miR-487b-3p	60.3326	12.0325	1.8144	0.0058523	0.057398
rno-miR-147	92.3413	25.4141	1.5733	0.0061251	0.05872
rno-miR-30c-2-3p	4522.38	15525.8	-1.5255	0.0062174	0.05872
rno-miR-874-3p	142.155	544.793	-1.6113	0.006888	0.06387
rno-miR-339-3p	445.044	1105.77	-1.2006	0.0070349	0.064068
rno-miR-673-5p	7.32478	0	2.0997	0.0081537	0.072954
rno-miR-21-5p	4.38121e+06	902044	1.7584	0.0085005	0.074746
rno-miR-200b-3p	53369.3	133573	-1.203	0.0087412	0.075192
rno-miR-148a-3p	308734	72353.5	1.6716	0.0088461	0.075192
novel_380	0.706178	8.67272	-2.0026	0.0097035	0.080247
rno-miR-298-3p	8.05912	0	2.046	0.0097555	0.080247
rno-miR-125b-1-3p	498.168	167.062	1.3732	0.010103	0.081784
rno-miR-486	7053.34	1043.36	1.8845	0.010652	0.084882
rno-miR-146b-3p	50.7578	12.5487	1.6017	0.011837	0.092495
rno-miR-547-5p	17.1256	54.9431	-1.4211	0.01197	0.092495
rno-miR-126a-5p	19712	3541.26	1.7848	0.012285	0.092715
rno-miR-135a-3p	27.0199	77.228	-1.321	0.012362	0.092715
rno-miR-378b	9.98673	28.5672	-1.3214	0.012989	0.096006
rno-miR-376b-5p	34.0901	9.543	1.5021	0.013359	0.096618
rno-miR-133a-5p	0.422232	12.9353	-1.9684	0.013588	0.096618
rno-miR-3590-3p	26.4318	5.42798	1.7088	0.013767	0.096618
rno-miR-195-5p	3607.65	1069.86	1.4616	0.01383	0.096618
rno-miR-325-5p	7.54268	22.209	-1.3387	0.014225	0.09683
rno-miR-211-5p	5.65915	0.496408	1.9155	0.014394	0.09683
rno-miR-122b	45.6164	186.693	-1.5981	0.01443	0.09683
rno-miR-495	158.05	44.5889	1.4961	0.014631	0.09691
rno-miR-133c	47.0274	169.576	-1.5056	0.015429	0.1006
rno-miR-708-5p	298.843	103.364	1.3229	0.015583	0.1006
rno-miR-133a-3p	47.4619	170.355	-1.4984	0.016133	0.10244
rno-miR-148a-5p	2150.91	632.386	1.4563	0.01627	0.10244
rno-miR-31a-3p	39.9219	13.5169	1.335	0.017255	0.10732
rno-miR-200b-5p	305.83	979.468	-1.4013	0.018028	0.11077
rno-miR-107-3p	1640.58	4861.15	-1.3343	0.018581	0.11281
rno-miR-192-3p	21.2685	100.355	-1.6358	0.01981	0.11886
rno-miR-16-5p	16540.1	6427.24	1.2011	0.020116	0.11929
rno-miR-542-3p	3998.13	810.841	1.6494	0.021305	0.12486
rno-miR-130a-5p	26.4318	6.45007	1.5577	0.021544	0.12486
rno-miR-337-3p	4.2835	0	1.7927	0.022418	NA
rno-miR-210-3p	150.738	412.8	-1.2532	0.022477	0.12749
rno-miR-3574	150.738	412.488	-1.2523	0.02254	0.12749
rno-miR-122-5p	75.0796	293.806	-1.5198	0.022906	0.12749
rno-miR-19b-3p	2901.52	475.22	1.7105	0.023377	0.12749
rno-miR-30c-1-3p	270.676	757.058	-1.2691	0.023523	0.12749
rno-miR-1-3p	110.455	26.5793	1.5489	0.023748	0.12749
rno-miR-3571	110.455	26.5793	1.5489	0.023748	0.12749
rno-miR-466b-2-3p	28.8458	8.04248	1.4465	0.024796	0.12988
novel_227	6.34572	0	1.7497	0.024896	0.12988
rno-miR-292-5p	6.64131	25.0132	-1.48	0.024958	0.12988
rno-miR-1839-5p	3310.74	7776.44	-1.0995	0.026009	0.12993
rno-miR-92b-3p	54.547	135.191	-1.1534	0.026132	0.12993
rno-miR-466c-5p	57.4134	19.4718	1.3038	0.026226	0.12993
rno-miR-466b-3p	27.576	6.66105	1.5271	0.026431	0.12993
rno-miR-322-5p	1576.89	563.349	1.2625	0.026496	0.12993
rno-miR-362-3p	70.2424	12.8089	1.6423	0.028054	0.13547
rno-miR-376c-3p	38.627	10.9957	1.4263	0.028235	0.13547
rno-miR-668	17.8402	3.63191	1.5933	0.028423	0.13547
rno-miR-298-5p	34.6786	4.84701	1.6759	0.031426	0.14684
rno-miR-708-3p	712.163	194.938	1.4393	0.031712	0.14684
rno-miR-1843a-3p	260.036	570.824	-1.0219	0.031959	0.14684
rno-miR-3578	84.0372	30.7664	1.223	0.033915	0.15307
rno-miR-369-5p	84.0372	30.7664	1.223	0.033915	0.15307
rno-miR-433-5p	3.4268	0	1.6321	0.035724	NA
novel_331	0	2.93121	-1.638	0.037901	NA
rno-miR-3592	110.483	38.4162	1.2443	0.043743	0.19569
rno-miR-410-3p	55.6839	23.4925	1.0803	0.044545	0.19755
rno-miR-382-3p	110.483	38.7283	1.2347	0.045421	0.1997
rno-miR-3547	0	2.42552	-1.5606	0.04744	NA
rno-miR-193b-3p	531.218	1418.42	-1.1789	0.048007	0.20926
rno-miR-150-5p	9451.64	3436	1.1985	0.049824	0.21534

## Sheet: DE-M6vsC
sRNA	M6_readcount	C_readcount	log2FoldChange	pval	padj
rno-miR-122b	21.9389	181.65	-2.2718	4.6285e-05	0.033094
rno-miR-122-5p	39.068	286.116	-1.9819	0.00075392	0.26953
rno-miR-293-5p	39.0119	3.68244	1.9444	0.0018736	0.44655
rno-miR-362-3p	80.5059	12.5672	1.742	0.0038934	0.53022
rno-miR-7a-1-3p	85.6171	23.4303	1.4743	0.0042935	0.53022
rno-miR-653-5p	470.402	79.8438	1.7026	0.0044494	0.53022
rno-miR-489-3p	48.0691	9.53444	1.5964	0.0064764	0.66152
rno-miR-142-3p	476.528	80.6686	1.6263	0.0077827	0.67429
rno-let-7a-1-3p	329.356	71.8655	1.5261	0.0090438	0.67429
rno-miR-374-3p	1008.91	226.323	1.5068	0.0097537	0.67429
rno-miR-489-5p	29.9846	5.48936	1.5442	0.011091	0.67429
rno-miR-135a-5p	1775.87	439.909	1.4302	0.01315	0.67429
rno-miR-148a-3p	241379	70991.1	1.3373	0.014264	0.67429
rno-miR-126a-5p	13008.2	3481.94	1.3848	0.014422	0.67429
rno-miR-31a-3p	55.055	13.3205	1.4215	0.014895	0.67429
rno-miR-190a-5p	198.489	46.5075	1.4329	0.015098	0.67429
rno-miR-3065-5p	61.8857	16.8333	1.3507	0.016975	0.67429
rno-miR-338-3p	61.8857	16.8333	1.3507	0.016975	0.67429
rno-miR-126b	47.4211	8.21915	1.4497	0.020821	0.74672
rno-miR-3590-3p	23.6044	5.26322	1.3795	0.023392	0.74672
rno-miR-3068-5p	1246.69	353.475	1.2985	0.023874	0.74672
rno-miR-101a-3p	96260.2	24218.8	1.343	0.02421	0.74672
rno-miR-291b	6.36194	0	1.3352	0.025542	0.74672
rno-miR-146a-3p	20.2375	4.24581	1.3656	0.027249	0.74672
rno-miR-7a-5p	25693.6	8578.4	1.198	0.028307	0.74672
rno-miR-101b-3p	21644.4	6598.69	1.2436	0.028564	0.74672
rno-miR-141-3p	412.616	126.98	1.2287	0.03082	0.74672
rno-miR-140-5p	4249.84	1626.03	1.1053	0.030886	0.74672
rno-miR-384-3p	18.1827	3.55099	1.3501	0.031187	0.74672
novel_82	706.721	296.4	1.0361	0.031331	0.74672
rno-miR-130a-5p	23.8478	6.28324	1.2733	0.033167	0.74739
rno-miR-322-5p	1686.38	555.187	1.1868	0.03349	0.74739
rno-miR-542-3p	2634.97	801.415	1.2149	0.035883	0.74739
rno-miR-136-3p	91.3602	21.6595	1.289	0.036554	0.74739
rno-miR-30d-3p	342.642	129.729	1.0959	0.036586	0.74739
rno-miR-148a-5p	1599.89	619.03	1.0796	0.038034	0.75254
rno-let-7c-1-3p	10.7748	1.74215	1.3141	0.038943	0.75254
rno-miR-30b-5p	9011.67	3554.35	1.0615	0.040526	0.76254
rno-miR-210-5p	0.24342	4.72909	-1.2721	0.042556	0.76804
rno-miR-190b-5p	264.887	96.5902	1.0997	0.044041	0.76804
rno-miR-196a-3p	21.0206	4.47701	1.2507	0.046865	0.79782
rno-miR-219a-5p	24.7811	4.44462	1.2571	0.048305	0.80321
