# Supplementary material for: Screening and identification of key microRNAs and regulatory pathways associated with the renal fibrosis process
Source: Royal Society of Chemistry journal article supplement (doi:10.1039/d1mo00498k), 2022-04-27
Supplement: d1mo00498k2.xlsx [file d1mo00498k2.xlsx]

## Sheet: The shared DE-miRNAs and their 
rno-miR-542-3p	rno-let-7c-1-3p	rno-miR-362-3p	rno-miR-126a-5p	rno-miR-7a-1-3p	rno-miR-148a-3p	rno-miR-148a-5p	rno-miR-146a-3p	rno-miR-322-5p	rno-miR-31a-3p	rno-miR-3590-3p	rno-miR-130a-5p	rno-miR-122-5p
Tnfrsf4	Fyn	Zfp358	Mdh1	Dusp27	LOC686013	Hoxd4	Fam3b	Sumf2	Dzip3	Nutm1	AABR07045462.1	Gper1
Zfp628	Egr2	Rxrg		Fhl2	C1galt1	Emc3	Gask1a	Hectd4	Lgr4	Snu13	Serpinf1	Pcp4
Nudt7	Lhx1	Alg11		Dnajc7	Mindy4	Frem2	Ccl5	Spag7	Hoxd3	Glrx3	Rnf146	Nacc1
Slco1a4	Lrp5	Ccdc151		LOC689618	Mphosph8	MGC114483	Matk	Cela1	Cryzl1	Tulp4	Tlnrd1	Nat9
Grm7	Cldn7	Rbp2		RGD1561661	Rasgrp2	Nek11	Apba3	Rangrf	Gimd1	Vom2r27	Taf5l	Tor3a
Selenof	Rasgrp2	Alg9		Ifi27l2b	Nup188	S100a7a	RGD1311595	G0s2		Sugp1	Mast4	Nap1l5
	Spata48	Chmp4bl1		Lmbrd2	Snx22	Stk38	Wnt8a	Prkaa2		Kif1b	Fbxo44	Atp13a2
	Lrp6	Zfp956		Fchsd2	Serpinb13		Wdr64	Cfap45			NEWGENE_1310139	Sln
		Agap3			Krtap1-1		Gsdmd	Sln			Gstz1	Mipol1
		Mtus2			Vsig10		Mad2l2	Fbxo2			Plin1	Nthl1
		LOC100911837			RT1-CE4		Zmynd12	Pacsin2			Timeless	Tshz3
		Dzip1-ps1			Commd4		Blmh	Gpr153			LOC498265	Hif1an
		Hira			Ceacam9		Ier5	Exosc10			Kdr	LOC100909857
		Naa60			Atp7a		Ambra1	Tbpl1				Cotl1
		Rnf38			Med12l		Gabbr1	Fabp9				Ankrd13d
		Hnrnpdl			Dnmt3b		Mtg2	Timm8a1				Hsd3b7
		Slc12a7			Dock6			Avl9				Bcat2
		LOC690784						Efna2				Ptcd2
		Pold2						Ppp2r2d				Nkx2-3
		AABR07066871.3						Cox4i1				Qars
		Ttc7a						Nectin2				Nfrkb
		Pycr3						Ube2j2				Shtn1
								Sil1				Csnk1e
								Fam170b
								Sh3pxd2a
								Ubl5
								Slc26a6
								Eif3g
								LOC100911725
								Arl2
								Zfp687
								Tex46
								Armcx2
								Noxo1
								Bfsp2
								Ska3
								Drc1
								Chst8
								Epha3
								Rap1gap
								Cdx2
								Mrc2
								Ctxn2
								Lrcol1
								Pate4
								Entpd7
								Rpl41
								Zfp622
								Msmp
								Baiap2
								Kb23
								RGD1309350
								Clasrp
								Mms19
								Snrk
								Zw10
								Nup50
								Btnl3
								Bsn
								Nicn1
								Fam219b
								B4galt7
								Dhx30
								Setd2
								Dyrk1b
								Dctn2
								Mapk3
								Tacc1
								Cul4a
								Mtrf1
